# Supplementary material
Source: publisher figshare collection journal article supplement (https://sage.figshare.com/ndownloader/files/14924915)
Supplement: Supplementary file 1 [file 14924915]

## Electronic Supplements

Table S1

*Three-Factor Item Mapping and Factor Loading of ESEM Model (Parent Rated SNAP-IV)  
for baseline data.*

| Items                                                                                                 | Factors      |          |              |
|-------------------------------------------------------------------------------------------------------|--------------|----------|--------------|
|                                                                                                       | Factor 1     | Factor 2 | Factor 3     |
| 1. Fails to give close attention to details or makes careless mistakes in schoolwork                  | <b>0.900</b> |          |              |
| 2. Has difficulty sustaining attention in tasks or play activities                                    | <b>0.699</b> |          |              |
| 3. Does not seem to listen when spoken to directly                                                    | <b>0.569</b> |          |              |
| 4. Does not follow through on instructions and fails to finish schoolwork, chores, or duties          | <b>0.847</b> |          |              |
| 5. Has difficulty organising tasks and activities                                                     | <b>0.808</b> |          |              |
| 6. Avoids tasks (e.g., schoolwork, homework) that requires sustained mental effort                    | <b>0.814</b> |          |              |
| 7. Loses things necessary for tasks or activities (e.g., toys, school assignments, pencils, or books) | <b>0.736</b> |          |              |
| 8. Is easily distracted                                                                               | <b>0.633</b> |          |              |
| 9. Is forgetful in daily activities                                                                   | <b>0.752</b> |          |              |
| 10. Fidgets with hands or feet or squirms in seat                                                     | <b>0.361</b> |          | <b>0.056</b> |

|                                                                                           |              |              |
|-------------------------------------------------------------------------------------------|--------------|--------------|
| 11. Leaves seat in classroom or in other situations in which remaining seated is expected |              | <b>0.049</b> |
| 12. Runs about or climbs excessively in situations in which it is inappropriate           | <b>0.342</b> | <b>0.059</b> |
| 13. Has difficulty playing or engaging in leisure activities quietly                      | <b>0.545</b> |              |
| 14. Is “on the go” or often acts as if “driven by a motor”                                | <b>0.540</b> | <b>0.059</b> |
| 15. Talks excessively                                                                     | <b>0.994</b> |              |
| 16. Blurts out answers before questions have been completed                               | <b>0.788</b> |              |
| 17. Has difficulty awaiting turn                                                          | <b>0.816</b> |              |
| 18. Interrupts or intrudes on others                                                      | <b>0.810</b> |              |

Note. Only significant loadings are presented for ease of reading.

Table S2

*Two-Factor Item Mapping and Factor Loading of 2-Factor Configural Invariance**(Baseline/Follow-up 1/ Follow-up 2) ESEM Model (Parent Rated SNAP-IV)*

| Items                                                                                                 | Factors                     |                           |
|-------------------------------------------------------------------------------------------------------|-----------------------------|---------------------------|
|                                                                                                       | Inattention                 | Hyperactivity/impulsivity |
| 1. Fails to give close attention to details or makes careless mistakes in schoolwork                  | <b>0.800/ 0.856/ 0.827</b>  |                           |
| 2. Has difficulty sustaining attention in tasks or play activities                                    | <b>0.624 / 0.769/ 0.716</b> |                           |
| 3. Does not seem to listen when spoken to directly                                                    | <b>0.520/ 0.660/ 0.607</b>  |                           |
| 4. Does not follow through on instructions and fails to finish schoolwork, chores, or duties          | <b>0.789/ 0.848/ 0.904</b>  |                           |
| 5. Has difficulty organising tasks and activities                                                     | <b>0.789/ 0.875/ 0.794</b>  |                           |
| 6. Avoids tasks (e.g., schoolwork, homework) that requires sustained mental effort                    | <b>0.738/ 0.786/ 0.752</b>  |                           |
| 7. Loses things necessary for tasks or activities (e.g., toys, school assignments, pencils, or books) | <b>0.748/ 0.741/ 0.821</b>  |                           |
| 8. Is easily distracted                                                                               | <b>0.547/ 0.575/ 0.667</b>  |                           |

|                                                                                                 |                            |
|-------------------------------------------------------------------------------------------------|----------------------------|
| 9. Is forgetful in daily activities                                                             | <b>0.720/ 0.746/ 0.732</b> |
| 10. Fidgets with hands or feet or<br>squirms in seat                                            | <b>0.591/ 0.585/ 0.558</b> |
| 11. Leaves seat in classroom or in<br>other situations in which<br>remaining seated is expected | <b>0.670/ 0.662/ 0.664</b> |
| 12. Runs about or climbs<br>excessively in situations in which<br>it is inappropriate           | <b>0.912/ 0.893/ 0.857</b> |
| 13. Has difficulty playing or<br>engaging in leisure activities<br>quietly                      | <b>0.699/ 0.632/ 0.691</b> |
| 14. Is “on the go” or often acts as<br>if “driven by a motor”                                   | <b>0.975/ 0.921/ 0.986</b> |
| 15. Talks excessively                                                                           | <b>0.888/ 0.841/ 0.852</b> |
| 16. Blurts out answers before<br>questions have been completed                                  | <b>0.731/ 0.625/ 0.713</b> |
| 17. Has difficulty awaiting turn                                                                | <b>0.795/ 0.617/ 0.806</b> |
| 18. Interrupts or intrudes on<br>others                                                         | <b>0.777/ 0.636/ 0.733</b> |

Note. Only significant loadings are presented for ease of reading. Data presented baseline/follow-up 1/ follow-up 2.

Table S3

*Bi-Two-Factor Item Mapping and Factor Loading of ESEM Model (Parent Rated SNAP-IV) for baseline data*

| Items                                                                                                 | Factors        |              |          |
|-------------------------------------------------------------------------------------------------------|----------------|--------------|----------|
|                                                                                                       | General Factor | Factor 1     | Factor 2 |
| 1. Fails to give close attention to details or makes careless mistakes in schoolwork                  | <b>0.710</b>   |              |          |
| 2. Has difficulty sustaining attention in tasks or play activities                                    | <b>0.524</b>   | <b>0.502</b> |          |
| 3. Does not seem to listen when spoken to directly                                                    | <b>0.437</b>   | <b>0.504</b> |          |
| 4. Does not follow through on instructions and fails to finish schoolwork, chores, or duties          | <b>0.701</b>   |              |          |
| 5. Has difficulty organising tasks and activities                                                     | <b>0.726</b>   | <b>0.300</b> |          |
| 6. Avoids tasks (e.g., schoolwork, homework) that requires sustained mental effort                    | <b>0.646</b>   |              |          |
| 7. Loses things necessary for tasks or activities (e.g., toys, school assignments, pencils, or books) | <b>0.706</b>   |              |          |
| 8. Is easily distracted                                                                               |                |              |          |
| 9. Is forgetful in daily activities                                                                   | <b>0.651</b>   | <b>0.345</b> |          |

|                                                                                                 |              |
|-------------------------------------------------------------------------------------------------|--------------|
| 10. Fidgets with hands or feet or<br>squirms in seat                                            | <b>0.709</b> |
| 11. Leaves seat in classroom or in<br>other situations in which<br>remaining seated is expected | <b>0.721</b> |
| 12. Runs about or climbs<br>excessively in situations in which<br>it is inappropriate           | <b>0.840</b> |
| 13. Has difficulty playing or<br>engaging in leisure activities<br>quietly                      |              |
| 14. Is “on the go” or often acts as<br>if “driven by a motor”                                   |              |
| 15. Talks excessively                                                                           |              |
| 16. Blurts out answers before<br>questions have been completed                                  |              |
| 17. Has difficulty awaiting turn                                                                |              |
| 18. Interrupts or intrudes on<br>others                                                         |              |

Note. Only significant loadings are presented for ease of reading. There were no significant correlations on the third factor.

Table S4

*Two-Factor Item Mapping and Factor Loading of 2-Factor Configural Invariance**(Baseline/Follow-up 1/ Follow-up 2) ESEM Model (Teacher Rated SNAP-IV)*

| Items                                                                                                 | Factors                    |                           |
|-------------------------------------------------------------------------------------------------------|----------------------------|---------------------------|
|                                                                                                       | Inattention                | Hyperactivity/impulsivity |
| 1. Fails to give close attention to details or makes careless mistakes in schoolwork                  | <b>0.834/ 0.736/ 0.864</b> |                           |
| 2. Has difficulty sustaining attention in tasks or play activities                                    | <b>0.847/ 0.805/ 0.849</b> |                           |
| 3. Does not seem to listen when spoken to directly                                                    | <b>0.726/ 0.785/ 0.766</b> |                           |
| 4. Does not follow through on instructions and fails to finish schoolwork, chores, or duties          | <b>0.825/ 0.903/ 1.00</b>  |                           |
| 5. Has difficulty organising tasks and activities                                                     | <b>0.926 / 1.00/ 0.998</b> |                           |
| 6. Avoids tasks (e.g., schoolwork, homework) that requires sustained mental effort                    | <b>0.831/ 0.778/ 0.841</b> |                           |
| 7. Loses things necessary for tasks or activities (e.g., toys, school assignments, pencils, or books) | <b>0.805/ 0.851/ 0.829</b> |                           |
| 8. Is easily distracted                                                                               | <b>0.862/ 0.745/ 0.794</b> |                           |
| 9. Is forgetful in daily activities                                                                   | <b>0.945/ 0.940/ 0.880</b> |                           |

|                                                                                                 |        |                            |
|-------------------------------------------------------------------------------------------------|--------|----------------------------|
| 10. Fidgets with hands or feet or<br>squirms in seat                                            | 0.416/ | <b>0.436/ 0.791/ 0.585</b> |
| 11. Leaves seat in classroom or in<br>other situations in which<br>remaining seated is expected |        | <b>0.623/ 0.800/ 0.709</b> |
| 12. Runs about or climbs<br>excessively in situations in which<br>it is inappropriate           |        | <b>0.667/ 0.739/ 0.517</b> |
| 13. Has difficulty playing or<br>engaging in leisure activities<br>quietly                      |        | <b>0.778/ 0.836/ 0.666</b> |
| 14. Is “on the go” or often acts as<br>if “driven by a motor”                                   |        | <b>0.863/ 0.871/ 0.868</b> |
| 15. Talks excessively                                                                           |        | <b>0.932/ 0.901/ 0.898</b> |
| 16. Blurts out answers before<br>questions have been completed                                  |        | <b>0.931/ 0.943/ 0.917</b> |
| 17. Has difficulty awaiting turn                                                                |        | <b>0.931/ 0.907/ 0.963</b> |
| 18. Interrupts or intrudes on<br>others                                                         |        | <b>0.953/ 0.942/ 0.949</b> |

Note. Only significant loadings are presented for ease of reading. Data presented baseline/ follow-up 1/ follow-up 2.



Table S5

*Three-Factor Item Mapping and Factor Loading of ESEM Model (Teacher Rated SNAP-IV) for baseline data.*

| Items                                                                                                 | Factors      |          |              |
|-------------------------------------------------------------------------------------------------------|--------------|----------|--------------|
|                                                                                                       | Factor 1     | Factor 2 | Factor 3     |
| 1. Fails to give close attention to details or makes careless mistakes in schoolwork                  | <b>0.815</b> |          |              |
| 2. Has difficulty sustaining attention in tasks or play activities                                    | <b>0.746</b> |          | <b>0.322</b> |
| 3. Does not seem to listen when spoken to directly                                                    | <b>0.734</b> |          |              |
| 4. Does not follow through on instructions and fails to finish schoolwork, chores, or duties          | <b>0.944</b> |          |              |
| 5. Has difficulty organising tasks and activities                                                     | <b>1.017</b> |          |              |
| 6. Avoids tasks (e.g., schoolwork, homework) that requires sustained mental effort                    | <b>0.886</b> |          | <b>0.147</b> |
| 7. Loses things necessary for tasks or activities (e.g., toys, school assignments, pencils, or books) | <b>0.966</b> |          | <b>0.399</b> |
| 8. Is easily distracted                                                                               | <b>0.725</b> |          | <b>0.245</b> |
| 9. Is forgetful in daily activities                                                                   | <b>0.980</b> |          |              |

|                                                                                                 |              |              |              |
|-------------------------------------------------------------------------------------------------|--------------|--------------|--------------|
| 10. Fidgets with hands or feet or<br>squirms in seat                                            | <b>0.815</b> | <b>0.545</b> | <b>0.490</b> |
| 11. Leaves seat in classroom or in<br>other situations in which<br>remaining seated is expected |              | <b>0.726</b> | <b>0.183</b> |
| 12. Runs about or climbs<br>excessively in situations in which<br>it is inappropriate           |              | <b>0.655</b> | <b>0.229</b> |
| 13. Has difficulty playing or<br>engaging in leisure activities<br>quietly                      |              | <b>0.794</b> | <b>0.182</b> |
| 14. Is “on the go” or often acts as<br>if “driven by a motor”                                   |              | <b>0.902</b> |              |
| 15. Talks excessively                                                                           |              | <b>0.995</b> |              |
| 16. Blurts out answers before<br>questions have been completed                                  |              | <b>1.009</b> |              |
| 17. Has difficulty awaiting turn                                                                |              | <b>0.992</b> | <b>0.182</b> |
| 18. Interrupts or intrudes on<br>others                                                         |              | <b>1.019</b> | <b>0.230</b> |

Note. Only significant loadings are presented for ease of reading.

Table S6

*Bi-Two-Factor Item Mapping and Factor Loading of 2 ESEM Model (Teacher Rated SNAP-IV) for baseline data.*

| Items                                                                                                 | Factors        |              |          |
|-------------------------------------------------------------------------------------------------------|----------------|--------------|----------|
|                                                                                                       | General Factor | Factor 1     | Factor 2 |
| 1. Fails to give close attention to details or makes careless mistakes in schoolwork                  | <b>0.670</b>   | <b>0.496</b> |          |
| 2. Has difficulty sustaining attention in tasks or play activities                                    | <b>0.838</b>   | <b>0.411</b> |          |
| 3. Does not seem to listen when spoken to directly                                                    | <b>0.664</b>   | <b>0.440</b> |          |
| 4. Does not follow through on instructions and fails to finish schoolwork, chores, or duties          | <b>0.673</b>   | <b>0.591</b> |          |
| 5. Has difficulty organising tasks and activities                                                     | <b>0.630</b>   | <b>0.639</b> |          |
| 6. Avoids tasks (e.g., schoolwork, homework) that requires sustained mental effort                    | <b>0.599</b>   | <b>0.579</b> |          |
| 7. Loses things necessary for tasks or activities (e.g., toys, school assignments, pencils, or books) | <b>0.438</b>   | <b>0.673</b> |          |
| 8. Is easily distracted                                                                               | <b>0.847</b>   | <b>0.410</b> |          |
| 9. Is forgetful in daily activities                                                                   | <b>0.558</b>   | <b>0.614</b> |          |

|                                                                                                 |              |              |
|-------------------------------------------------------------------------------------------------|--------------|--------------|
| 10. Fidgets with hands or feet or<br>squirms in seat                                            | <b>0.851</b> |              |
| 11. Leaves seat in classroom or in<br>other situations in which<br>remaining seated is expected | <b>0.824</b> |              |
| 12. Runs about or climbs<br>excessively in situations in which<br>it is inappropriate           | <b>0.765</b> |              |
| 13. Has difficulty playing or<br>engaging in leisure activities<br>quietly                      | <b>0.818</b> | <b>0.324</b> |
| 14. Is “on the go” or often acts as<br>if “driven by a motor”                                   | <b>0.827</b> | <b>0.337</b> |
| 15. Talks excessively                                                                           | <b>0.720</b> | <b>0.525</b> |
| 16. Blurts out answers before<br>questions have been completed                                  | <b>0.686</b> | <b>0.596</b> |
| 17. Has difficulty awaiting turn                                                                | <b>0.697</b> | <b>0.646</b> |
| 18. Interrupts or intrudes on<br>others                                                         | <b>0.678</b> | <b>0.689</b> |

Note. Only significant loadings are presented for ease of reading.

Table S7

*Association between combined parent and teacher SNAP-IV scores and diagnosis from DAWBA and clinician for ADHD/Hyperkinetic disorder*

| <b>SNAP-IV</b> | <b>DAWBA ICD-10</b>      | <b>DAWBA DSM-5</b>       | <b>Clinical diagnosis</b> |
|----------------|--------------------------|--------------------------|---------------------------|
| <b>scales</b>  | <b>HKD present</b>       | <b>ADHD present</b>      | <b>ADHD present</b>       |
|                | OR(95% CI),p=            | OR(95% CI),p=            | OR(95% CI),p=             |
| Inatt - p      | 3.12(1.32-7.40), p=0.010 | 3.13(1.31-7.44),p=0.010  | 1.01(0.33-2.98),p=0.989   |
| Hyp / imp - p  | 2.36(1.06-5.22),p=0.034  | 3.82 (1.55-9.40),p=0.003 | 2.74(0.96-7.77),p=0.059   |
| Inatt - t      | 1.04(0.50-2.16),p= 0.912 | 1.60(0.73-3.50),p=0.238  | 1.87(0.65-5.44),p=0.248   |
| Hyp/ imp – t   | 2.01(1.05-3.86),p=0.036  | 1.60(0.80-3.22),p=0.185  | 1.45(0.55-3.77),p=0.445   |

Note. Inatt = inattention. Hyp = hyperactivity. Imp = impulsivity
